# Supplementary material for: Social-Stress-Responsive Microbiota Induces Stimulation of Self-Reactive Effector T Helper Cells
Source: PubMed Central journal article supplement (PMC6517692; doi:10.1128/msystems.00292-18), 2019-05-14
Supplement: mSystems.00292-18-sf001.pdf [file mSystems.00292-18-sf001.pdf]

Figure 1S

A

### Chronic social defeat (SD) model

Young intruder

Retired breeder  
ICR mouse  
Dominant resident

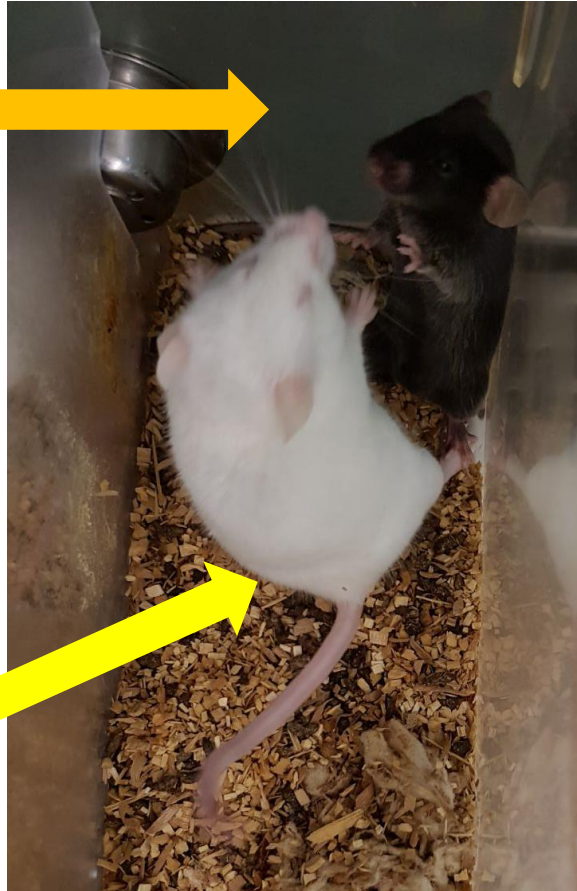

B

**Bacteroidetes**

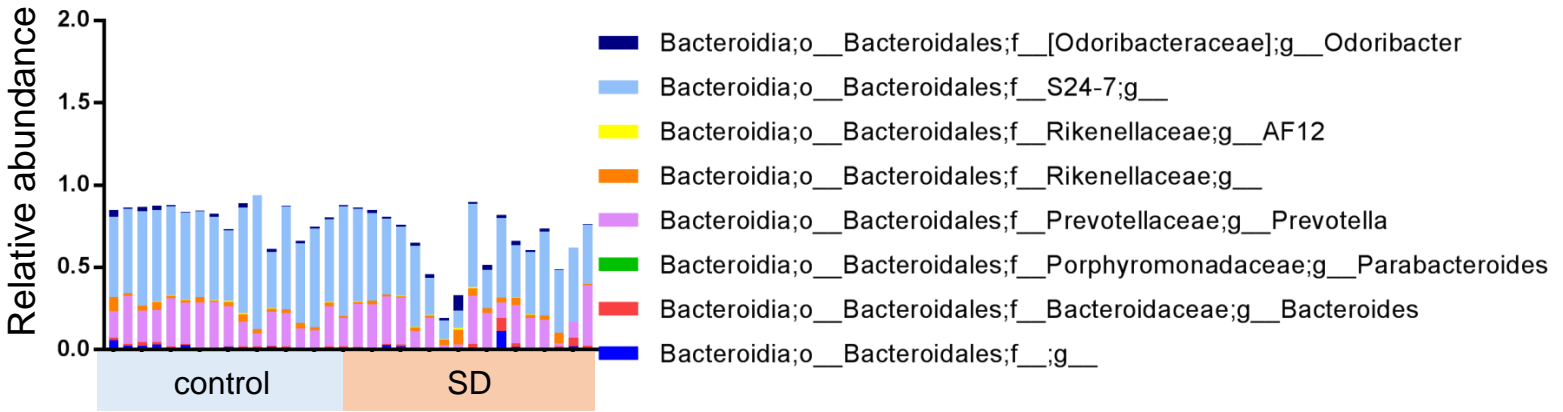

C

**Firmicutes**

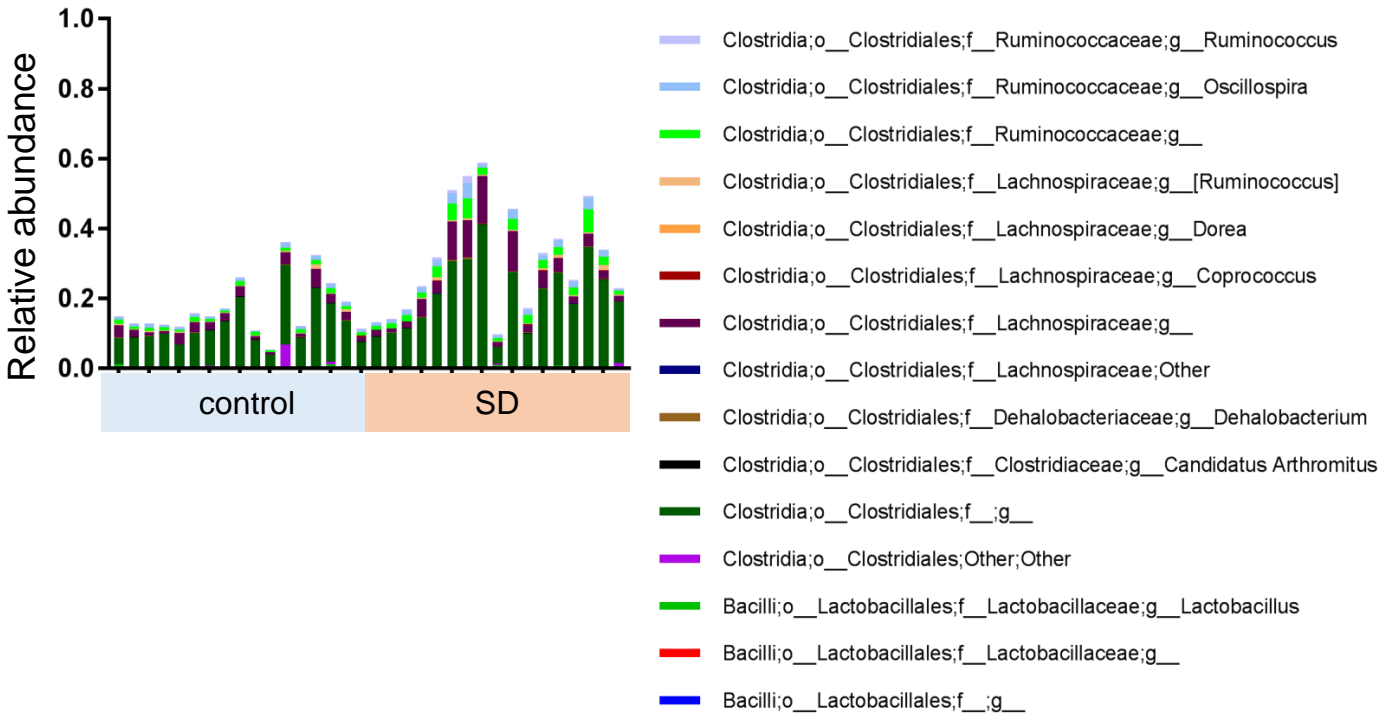

D

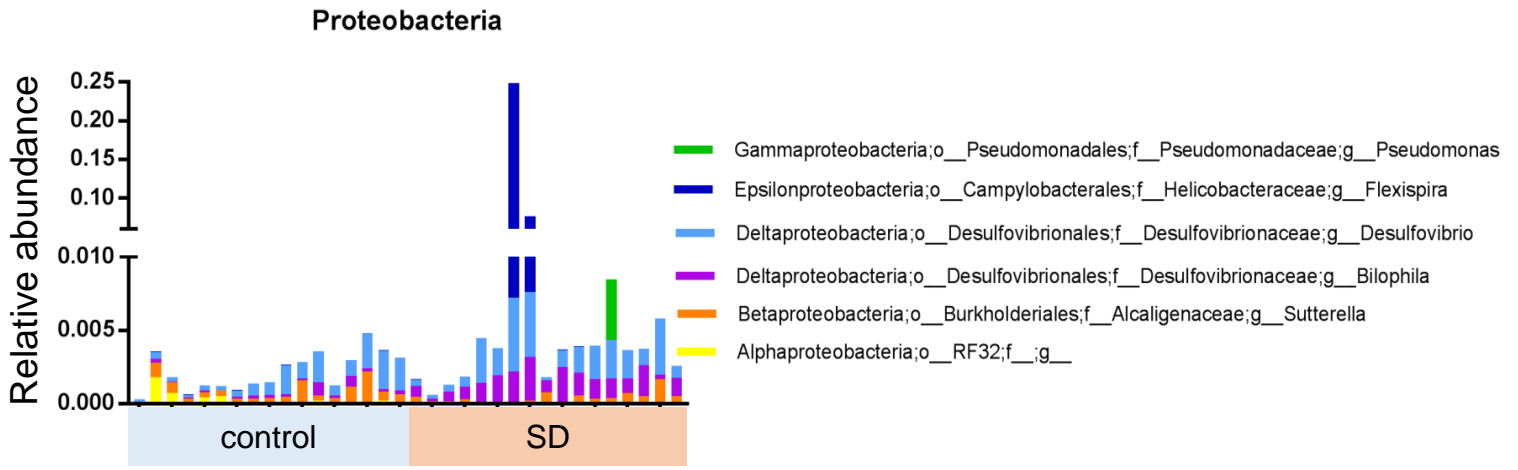

E

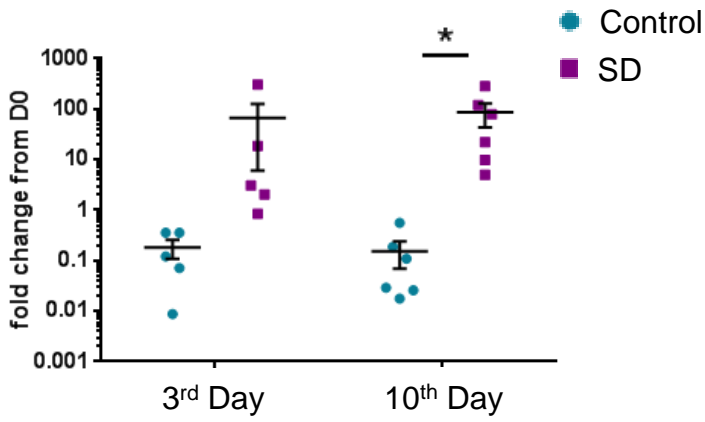

F

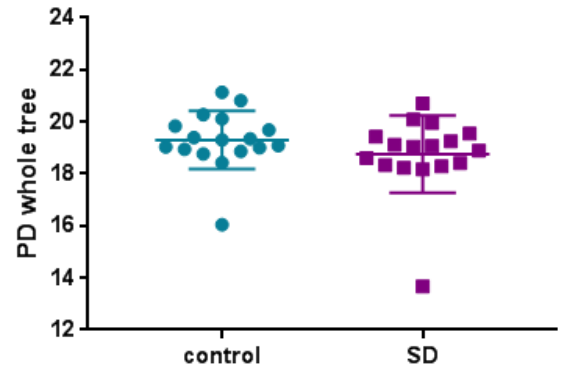

G

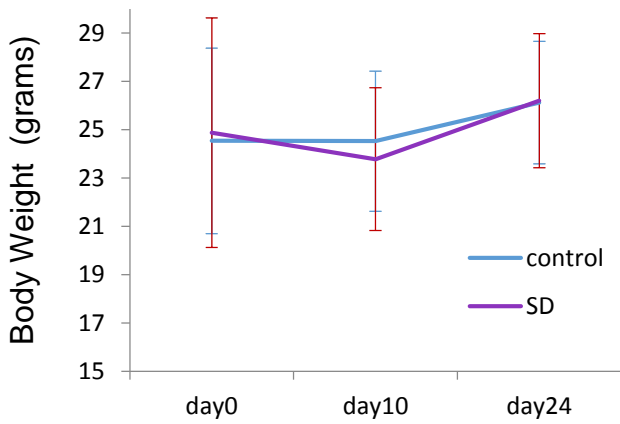

H

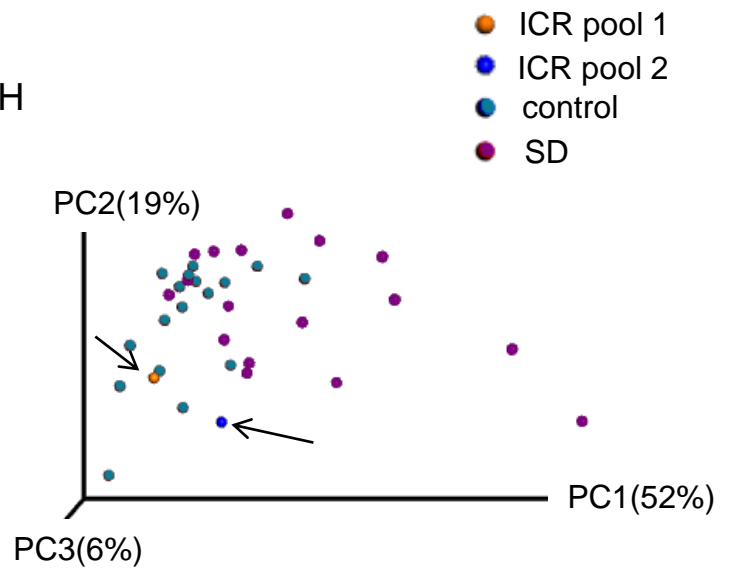

## Computational analyses for the increased bacterial functions following SD (PICRUSt)

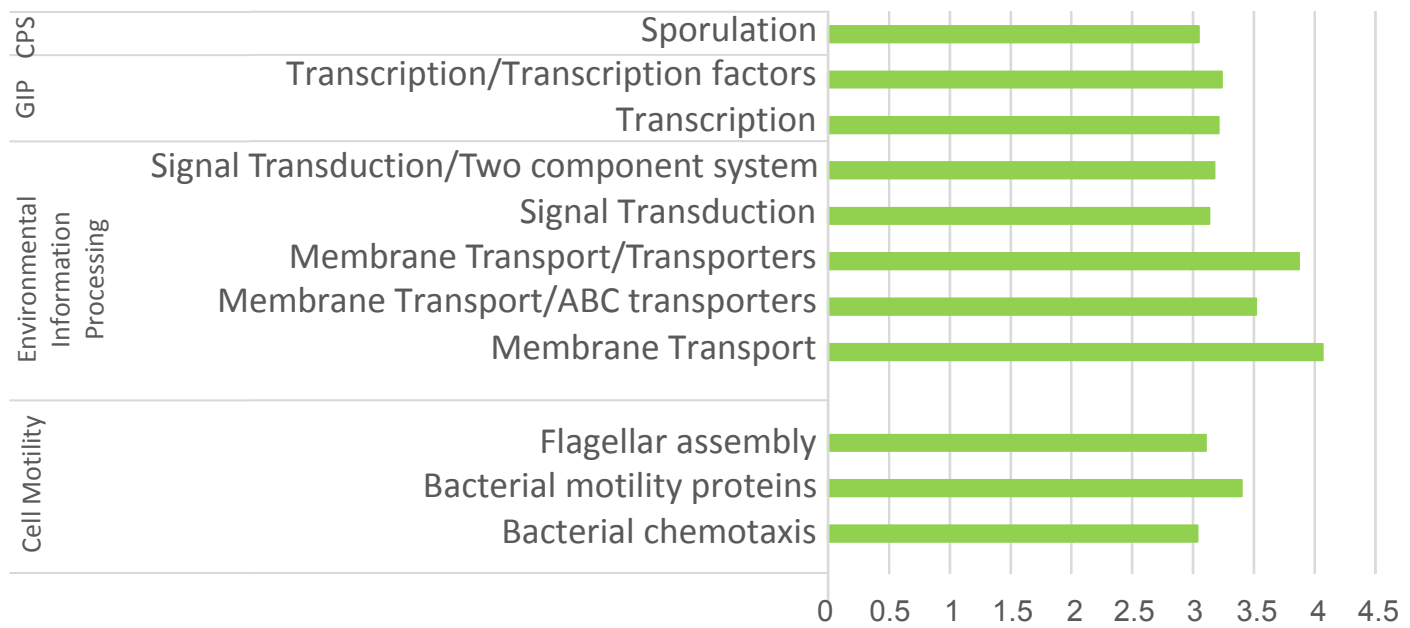

J

YALI0B09867p

fhu operon transcription regulator

Transposase putative

Negative regulator of genetic competence sporulation and motility

PF14266 domain protein

9-O-acetyl\_N\_acetylneuraminate esterase

UPF0297 protein BACPEC\_00725

flagellar protein FliS, partial

flagellar biosynthesis protein FliS

chromosomal replication initiator protein DnaA

flagellar hook-associated protein FlgK

Activator of (R)-2-hydroxyglutaryl-CoA dehydratase

DTDP-glucose 4,6-dehydratase (Fragment)

DAK2 domain fusion protein YloV

Cysteine synthase
