# Supplementary material for: Social-Stress-Responsive Microbiota Induces Stimulation of Self-Reactive Effector T Helper Cells
Source: PubMed Central journal article supplement (PMC6517692; doi:10.1128/msystems.00292-18), 2019-05-14

Figure S3

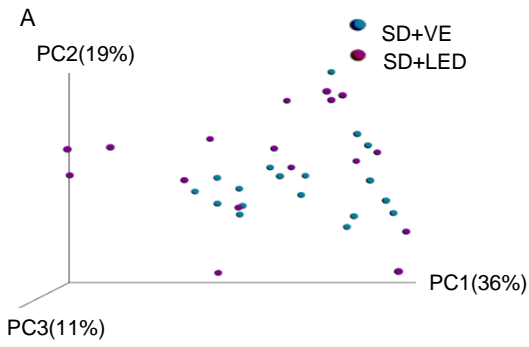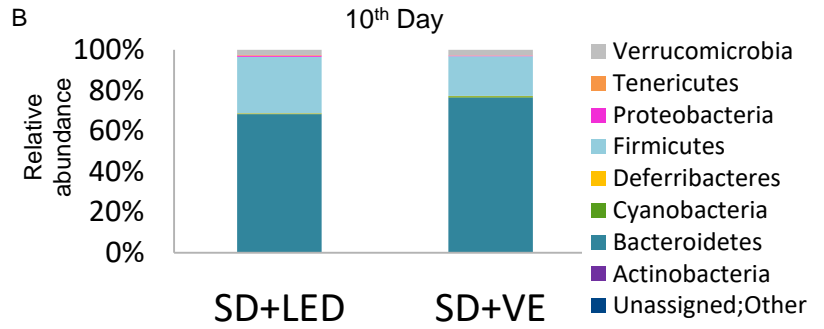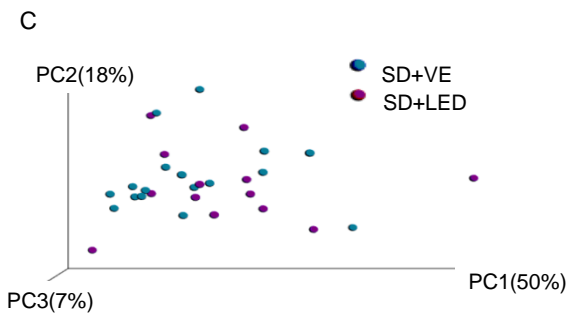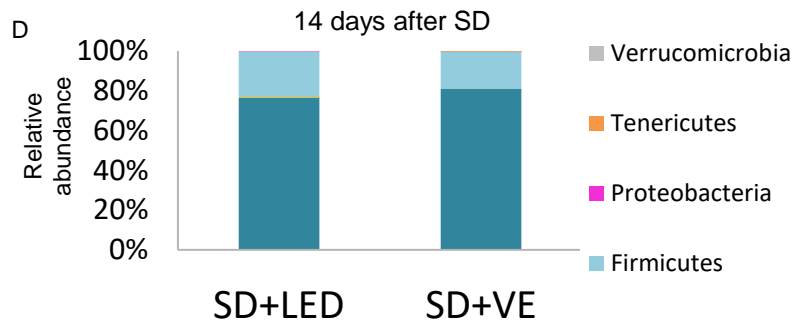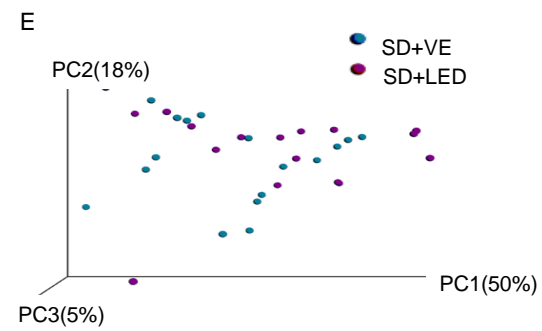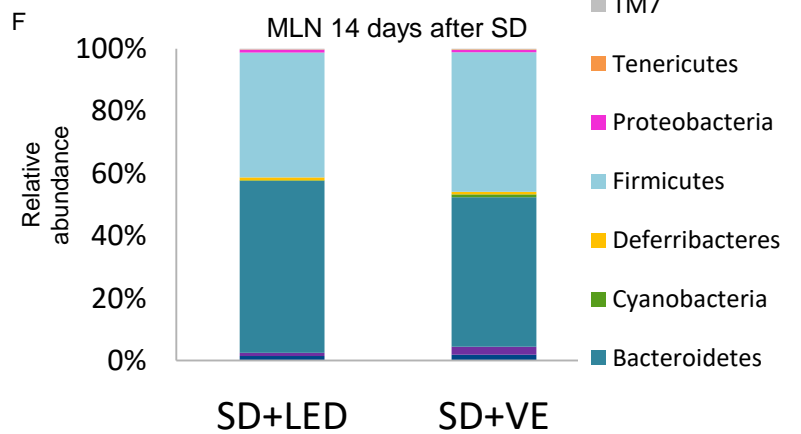

Supplement: mSystems.00292-18-sf003.pdf [file mSystems.00292-18-sf003.pdf]
