# Supplementary material for: Social-Stress-Responsive Microbiota Induces Stimulation of Self-Reactive Effector T Helper Cells
Source: PubMed Central journal article supplement (PMC6517692; doi:10.1128/msystems.00292-18), 2019-05-14
Supplement: mSystems.00292-18-st001.pdf [file mSystems.00292-18-st001.pdf]

## Supplementary Tables:

**Table S1**

| INCREASE |                                                                                                                 |         |              |         |             |
|----------|-----------------------------------------------------------------------------------------------------------------|---------|--------------|---------|-------------|
| # of Exp | OTU                                                                                                             | P       | Control mean | SD mean | Fold change |
| 3 Exp    | p__Proteobacteria c__Deltaproteobacteria o__Desulfovibrionales f__Desulfovibrionaceae g__Bilophila s__          | 3.0E-05 | 0.021%       | 0.134%  | 6.44        |
|          | p__Firmicutes c__Clostridia o__Clostridiales f__Ruminococcaceae g__ s__                                         | 3.3E-05 | 0.925%       | 2.592%  | 2.80        |
|          | p__Firmicutes c__Clostridia o__Clostridiales f__Ruminococcaceae g__Ruminococcus s__                             | 4.1E-04 | 0.214%       | 0.526%  | 2.46        |
|          | p__Firmicutes c__Clostridia o__Clostridiales f__Ruminococcaceae g__Oscillospira s__                             | 4.1E-04 | 0.765%       | 1.771%  | 2.32        |
|          | p__Deferribacteres c__Deferribacteres o__Deferribacterales f__Deferribacteraceae g__Mucispirillum s__schaedleri | 0.001   | 0.264%       | 0.920%  | 3.48        |
|          | p__Firmicutes c__Clostridia o__Clostridiales f__ g__ s__                                                        | 0.003   | 11.57%       | 20.85%  | 1.80        |
|          | p__Firmicutes c__Clostridia o__Clostridiales f__Dehalobacteriaceae g__Dehalobacterium s__                       | 0.023   | 0.060%       | 0.142%  | 2.35        |
| DECREASE |                                                                                                                 |         |              |         |             |
| # of Exp | OTU                                                                                                             | P       | Control mean | SD mean | Fold change |
| 3 Exp    | p__Bacteroidetes c__Bacteroidia o__Bacteroidales f__S24-7 g__ s__                                               | 4.7E-04 | 54.910 %     | 38.329% | 1.43        |
|          | p__Firmicutes c__Bacilli o__Lactobacillales f__Lactobacillaceae g__Lactobacillus s__                            | 0.004   | 0.363%       | 0.143%  | 2.53        |
|          | p__Proteobacteria c__Alphaproteobacteria o__RF32 f__ g__ s__                                                    | 0.031   | 0.025%       | 0.003%  | 8.46        |
