# Supplementary material for: Social-Stress-Responsive Microbiota Induces Stimulation of Self-Reactive Effector T Helper Cells
Source: PubMed Central journal article supplement (PMC6517692; doi:10.1128/msystems.00292-18), 2019-05-14
Supplement: mSystems.00292-18-st002.pdf [file mSystems.00292-18-st002.pdf]

**Table S2**

**A.**

| INCREASE |                                                                                                                 |       |              |         |             |
|----------|-----------------------------------------------------------------------------------------------------------------|-------|--------------|---------|-------------|
| # of Exp | OTU                                                                                                             | P     | Control mean | SD mean | Fold change |
| Exp 1    | p__Firmicutes c__Bacilli o__Bacillales f__Staphylococcaceae g__Jeotgalicoccus s__psychrophilus                  | 0.008 | 1.100%       | 2.550%  | 2.32        |
|          | p__Proteobacteria c__Gammaproteobacteria o__Xanthomonadales f__Xanthomonadaceae g__ s__                         | 0.018 | 0.175%       | 0.715%  | 4.09        |
|          | p__Firmicutes c__Bacilli o__Lactobacillales f__Enterococcaceae g__Enterococcus Other                            | 0.028 | 0.196%       | 0.560%  | 2.86        |
|          | p__Firmicutes c__Bacilli o__Lactobacillales f__Lactobacillaceae g__ s__                                         | 0.037 | 0.000%       | 0.390%  | N/A         |
|          | p__Firmicutes c__Bacilli o__Turicibacterales f__Turicibacteraceae g__Turicibacter s__                           | 0.040 | 0.021%       | 0.075%  | 3.60        |
|          | p__Proteobacteria c__Alphaproteobacteria o__Caulobacteriales f__Caulobacteraceae g__Brevundimonas s__diminuta   | 0.045 | 2.063%       | 5.650%  | 2.74        |
|          | p__Proteobacteria c__Gammaproteobacteria o__Enterobacteriales f__Enterobacteriaceae g__ s__                     | 0.045 | 1.525%       | 3.505%  | 2.30        |
| Exp 2    | p__Firmicutes c__Clostridia o__Clostridiales f__ g__ s__                                                        | 0.004 | 15.258%      | 34.833% | 2.28        |
|          | p__Firmicutes c__Clostridia o__Clostridiales f__Lachnospiraceae g__Coprococcus s__                              | 0.015 | 0.113%       | 0.242%  | 2.15        |
|          | p__Cyanobacteria c__4C0d-2 o__YS2 f__ g__ s__                                                                   | 0.021 | 0.008%       | 0.104%  | 12.50       |
|          | p__Firmicutes c__Clostridia o__Clostridiales f__Lachnospiraceae Other Other                                     | 0.025 | 0.267%       | 0.704%  | 2.64        |
|          | p__Deferribacteres c__Deferribacteres o__Deferribacterales f__Deferribacteraceae g__Mucispirillum s__schaedleri | 0.037 | 1.971%       | 7.629%  | 3.87        |
|          | p__Firmicutes c__Clostridia o__Clostridiales f__Ruminococcaceae g__Ruminococcus s__                             | 0.045 | 0.296%       | 0.596%  | 2.01        |
| Exp 3    | p__Firmicutes c__Bacilli o__Gemellales f__Gemellaceae g__ s__                                                   | 0.022 | 0.000%       | 0.179%  | N/A         |
|          | p__Proteobacteria c__Epsilonproteobacteria o__Campylobacteriales f__Helicobacteraceae g__Helicobacter           | 0.022 | 0.000%       | 0.488%  | N/A         |
|          | p__Actinobacteria c__Coriobacteriia o__Coriobacteriales f__Coriobacteriaceae g__Adlercreutzia s__               | 0.026 | 0.013%       | 0.167%  | 13.33       |
|          | p__Cyanobacteria c__4C0d-2 o__YS2 f__ g__ s__                                                                   | 0.033 | 0.013%       | 0.113%  | 9.00        |
| DECREASE |                                                                                                                 |       |              |         |             |
| # of Exp | OTU                                                                                                             | P     | Control mean | SD mean | Fold change |
| Exp 1    | p__Bacteroidetes c__Bacteroidia o__Bacteroidales f__Prevotellaceae g__Prevotella s__                            | 0.010 | 3.563%       | 1.146%  | 3.11        |
|          | p__Bacteroidetes c__Bacteroidia o__Bacteroidales f__Bacteroidaceae g__Bacteroides s__acidifaciens               | 0.016 | 0.483%       | 0.138%  | 3.52        |
|          | p__Proteobacteria c__Alphaproteobacteria o__RF32 f__ g__ s__                                                    | 0.021 | 0.021%       | 0.000%  | N/A         |
|          | p__Proteobacteria c__Betaproteobacteria o__Burkholderiales f__Alcaligenaceae g__Sutterella s__                  | 0.024 | 0.283%       | 0.079%  | 3.58        |
|          | p__Bacteroidetes c__Bacteroidia o__Bacteroidales f__Rikenellaceae g__AF12 s__                                   | 0.030 | 0.217%       | 0.050%  | 4.33        |
|          | p__Firmicutes c__Erysipelotrichi o__Erysipelotrichales f__Erysipelotrichaceae g__Allobaculum s__                | 0.036 | 0.067%       | 0.013%  | 5.33        |
|          | p__Bacteroidetes c__Bacteroidia o__Bacteroidales f__ g__ s__                                                    | 0.037 | 1.263%       | 0.479%  | 2.63        |
|          | p__Firmicutes c__Clostridia o__Clostridiales f__Peptococcaceae g__ s__                                          | 0.045 | 0.054%       | 0.013%  | 4.33        |
|          | p__Bacteroidetes c__Bacteroidia o__Bacteroidales Other Other Other                                              | 0.049 | 0.092%       | 0.029%  | 3.14        |

**B.**

| INCREASE |                                                                                                                 |       |              |         |             |
|----------|-----------------------------------------------------------------------------------------------------------------|-------|--------------|---------|-------------|
| # of Exp | OTU                                                                                                             | P     | Control mean | SD mean | Fold change |
| Exp 1    | p__Actinobacteria c__Actinobacteria o__Actinomycetales f__Micrococcaceae g__ s__                                | 0.011 | 0.000%       | 0.650%  | N/A         |
|          | p__Proteobacteria c__Alphaproteobacteria o__Caulobacterales f__Caulobacteraceae g__Brevundimonas s__diminuta    | 0.022 | 0.088%       | 0.320%  | 3.66        |
| Exp 2    | p__Bacteroidetes c__Bacteroidia o__Bacteroidales f__Bacteroidaceae g__Bacteroides s__                           | 0.006 | 0.104%       | 1.358%  | 13.04       |
|          | p__Firmicutes c__Clostridia o__Clostridiales f__Dehalobacteriaceae g__Dehalobacterium s__                       | 0.006 | 0.154%       | 0.663%  | 4.30        |
|          | p__Proteobacteria c__Epsilonproteobacteria o__Campylobacteriales f__Helicobacteraceae g__Helicobacter           | 0.007 | 0.000%       | 0.725%  | N/A         |
|          | p__Bacteroidetes c__Bacteroidia o__Bacteroidales f__Bacteroidaceae g__Bacteroides s__acidifaciens               | 0.008 | 0.046%       | 0.492%  | 10.73       |
|          | Unassigned Other Other Other Other Other Other                                                                  | 0.008 | 0.146%       | 2.317%  | 15.89       |
|          | p__Actinobacteria c__Coriobacteriia o__Coriobacteriales f__Coriobacteriaceae g__Adlercreutzia s__               | 0.009 | 0.025%       | 0.125%  | 5.00        |
|          | p__Firmicutes c__Clostridia o__Clostridiales f__Clostridiaceae g__Candidatus Arthromitus s__                    | 0.036 | 0.096%       | 0.354%  | 3.70        |
| DECREASE |                                                                                                                 |       |              |         |             |
| # of Exp | OTU                                                                                                             | P     | Control mean | SD mean | Fold change |
| Exp 1    | p__Deferribacteres c__Deferribacteres o__Deferribacterales f__Deferribacteraceae g__Mucispirillum s__schaedleri | 0.028 | 1.113%       | 0.255%  | 4.36        |
