# Supplementary material for: Social-Stress-Responsive Microbiota Induces Stimulation of Self-Reactive Effector T Helper Cells
Source: PubMed Central journal article supplement (PMC6517692; doi:10.1128/msystems.00292-18), 2019-05-14
Supplement: mSystems.00292-18-st003.pdf [file mSystems.00292-18-st003.pdf]

**Table S3**

| INCREASE |                                                                                                    |       |              |         |             |
|----------|----------------------------------------------------------------------------------------------------|-------|--------------|---------|-------------|
| # of Exp | OTU                                                                                                | P     | Control mean | SD mean | Fold change |
| Exp 1    | p__Proteobacteria c__Gammaproteobacteria o__Enterobacteriales f__Enterobacteriaceae g__Proteus s__ | 0.002 | 0.000%       | 8.538%  | N/A         |
|          | p__Firmicutes c__Bacilli o__Lactobacillales f__Streptococcaceae g__Lactococcus s__garvieae         | 0.007 | 0.000%       | 0.213%  | N/A         |
|          | p__Firmicutes c__Bacilli o__Lactobacillales f__Lactobacillaceae g__Lactobacillus s__               | 0.016 | 2.321%       | 38.033% | 16.39       |
|          | p__Cyanobacteria c__4C0d-2 o__YS2 f__ g__ s__                                                      | 0.056 | 0.000%       | 0.025%  | N/A         |
| DECREASE |                                                                                                    |       |              |         |             |
| # of Exp | OTU                                                                                                | P     | Control mean | SD mean | Fold change |
| Exp 1    | p__Firmicutes c__Clostridia o__Clostridiales f__Ruminococcaceae g__Ruminococcus s__                | 0.004 | 0.888%       | 0.117%  | 7.61        |
|          | p__Bacteroidetes c__Bacteroidia o__Bacteroidales f__S24-7 g__ s__                                  | 0.010 | 51.667%      | 24.267% | 2.13        |
|          | p__Proteobacteria c__Betaproteobacteria o__Burkholderiales f__Alcaligenaceae g__Sutterella s__     | 0.016 | 0.963%       | 0.313%  | 3.08        |
