# Supplementary material for: Social-Stress-Responsive Microbiota Induces Stimulation of Self-Reactive Effector T Helper Cells
Source: PubMed Central journal article supplement (PMC6517692; doi:10.1128/msystems.00292-18), 2019-05-14
Supplement: mSystems.00292-18-st004.pdf [file mSystems.00292-18-st004.pdf]

**Table S4**

**A.**

| DECREASE (by LED209 administration) |                                                                                      |       |            |             |             |
|-------------------------------------|--------------------------------------------------------------------------------------|-------|------------|-------------|-------------|
| # of Exp                            | OTU                                                                                  | P     | SD+ve mean | SD+LED mean | Fold change |
| 3 Exp                               | p__Bacteroidetes c__Bacteroidia o__Bacteroidales f__Rikenellaceae g__AF12 s__        | 0.003 | 0.246%     | 0.117%      | 2.10        |
|                                     | p__Bacteroidetes c__Bacteroidia o__Bacteroidales f__Prevotellaceae g__Prevotella s__ | 0.014 | 19.215%    | 15.638%     | 1.23        |
| INCREASE                            |                                                                                      |       |            |             |             |
| # of Exp                            | OTU                                                                                  | P     | SD+ve mean | SD+LED mean | Fold change |
| 3 Exp                               | p__Tenericutes c__Mollicutes o__RF39 f__ g__ s__                                     | 0.016 | 0.024%     | 0.032%      | 1.35        |

**B.**

| DECREASE (by LED209 administration) |                                                                                                              |       |            |             |             |
|-------------------------------------|--------------------------------------------------------------------------------------------------------------|-------|------------|-------------|-------------|
| # of Exp                            | OTU                                                                                                          | P     | SD+Ve mean | SD+LED mean | Fold change |
| Exp1                                | p__Firmicutes c__Bacilli o__Bacillales f__Planococcaceae g__ s__                                             | 0.007 | 0.058%     | 0.000%      | N/A         |
|                                     | p__Proteobacteria c__Gammaproteobacteria o__Pseudomonadales f__Moraxellaceae g__Acinetobacter Other          | 0.022 | 0.075%     | 0.000%      | N/A         |
| Exp2                                | p__Firmicutes c__Clostridia o__Clostridiales f__Ruminococcaceae Other Other                                  | 0.013 | 0.413%     | 0.096%      | 4.31        |
|                                     | Unassigned Other Other Other Other Other Other                                                               | 0.016 | 1.246%     | 0.464%      | 2.68        |
| Exp3                                | p__Bacteroidetes c__Bacteroidia o__Bacteroidales f__Rikenellaceae g__AF12 s__                                | 0.009 | 0.184%     | 0.030%      | 6.22        |
|                                     | p__Actinobacteria c__Actinobacteria o__Actinomycetales f__Propionibacteriaceae g__Propionibacterium s__acnes | 0.013 | 0.259%     | 0.016%      | 15.80       |
|                                     | p__Bacteroidetes c__Bacteroidia o__Bacteroidales f__ g__ s__                                                 | 0.016 | 0.662%     | 0.197%      | 3.37        |
|                                     | p__Firmicutes c__Bacilli o__Lactobacillales f__Lactobacillaceae g__Lactobacillus s__                         | 0.047 | 2.292%     | 1.413%      | 1.62        |
| INCREASE                            |                                                                                                              |       |            |             |             |
| # of Exp                            | OTU                                                                                                          | P     | SD+Ve mean | SD+LED mean | Fold change |
| Exp1                                | p__Bacteroidetes c__Bacteroidia o__Bacteroidales f__Bacteroidaceae g__Bacteroides s__acidifaciens            | 0.046 | 0.067%     | 0.304%      | 4.56        |
| Exp2                                | p__Proteobacteria c__Betaproteobacteria o__Burkholderiales f__Alcaligenaceae g__Suttrella s__                | 0.046 | 0.019%     | 0.139%      | 7.29        |
| Exp3                                | p__Proteobacteria c__Betaproteobacteria o__Burkholderiales f__Alcaligenaceae g__Suttrella s__                | 0.016 | 0.059%     | 0.233%      | 3.94        |
